# Supplementary material for: Explainable machine-learning predictions for catalysts in CO 2 -assisted propane oxidative dehydrogenation
Source: Royal Society of Chemistry journal article supplement (doi:10.1039/d4ra00406j), 2024-01-01
Supplement: d4ra00406j1.pdf [file d4ra00406j1.pdf]

## Explainable machine-learning predictions for catalysts in CO<sub>2</sub>- assistance propane oxidative dehydrogenation

Hongyu Liu <sup>a,b,#</sup>, Kangyu Liu <sup>b,#</sup>, Hairuo Zhu <sup>a</sup>, Weiqing Guo <sup>a</sup>, Yuming Li <sup>a,\*</sup>

<sup>a</sup> State Key Laboratory of Heavy Oil Processing, China University of Petroleum, Beijing, 102249, PR China

<sup>b</sup> National Engineering Research Center for Petroleum Refining Technology and Catalyst, Research Institute of Petroleum Processing Co., Ltd., SINOPEC, Beijing 100083, China.

\* Corresponding author. E-mail address: liyuming@cup.edu.cn

# These authors contributed equally.

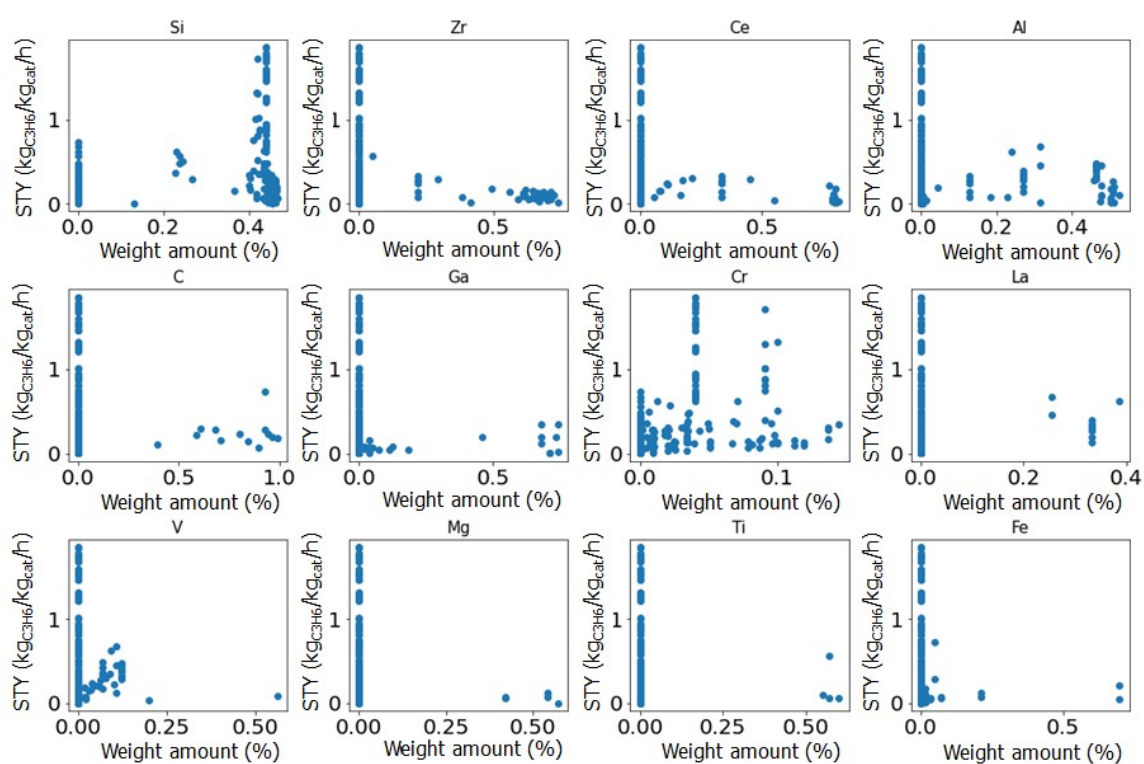

Fig. S1 Overview over the whole dataset with chemical component versus STY value

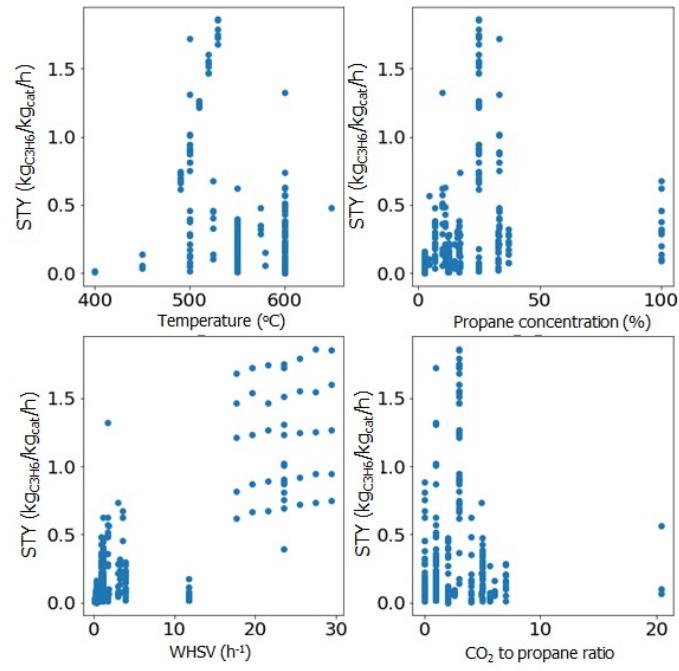

Fig. S2 Overview over the whole dataset with reaction conditions versus STY value

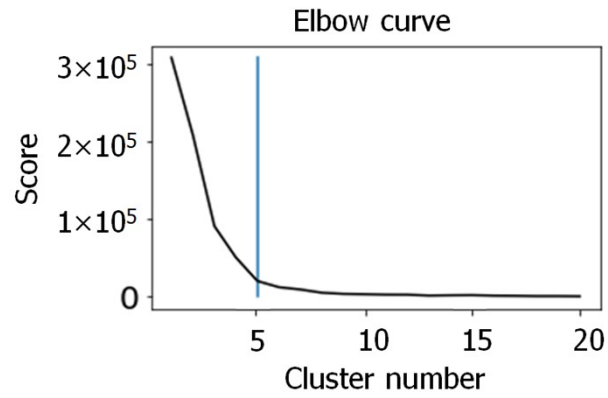

Fig. S3 Elbow curve of the scores with the K-Means clustering algorithm

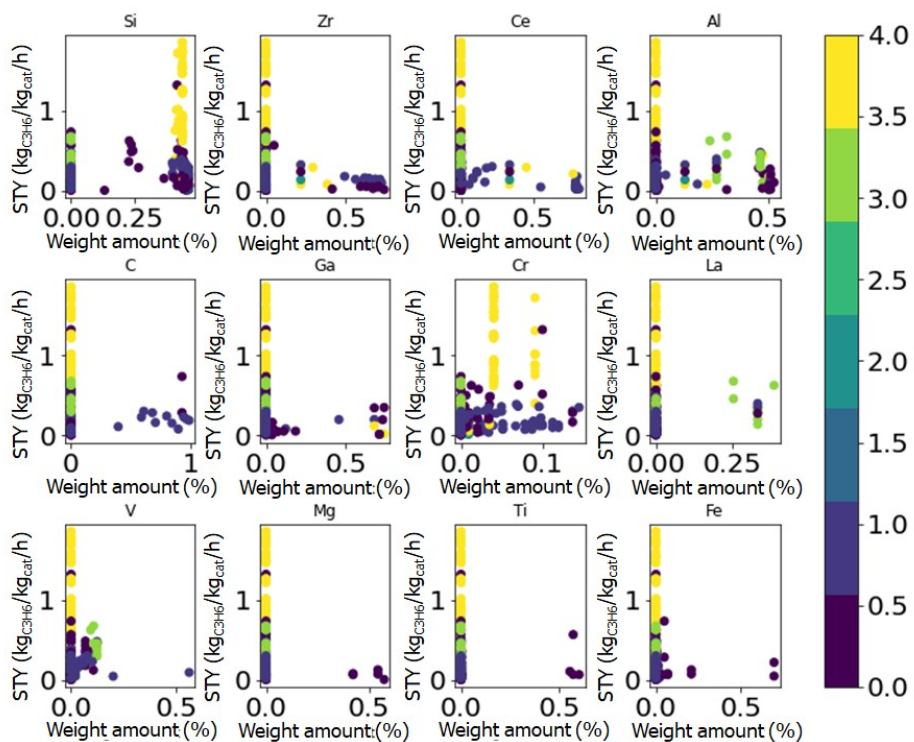

Fig. S4 Coloring the chemical components with highest loading in the dataset with respect to the cluster analysis

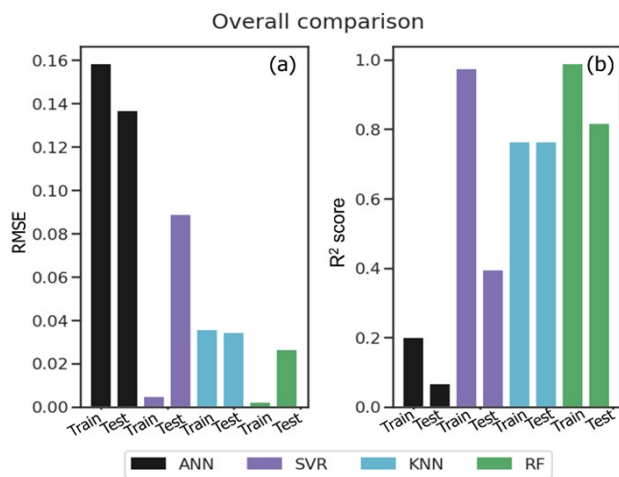

Fig. S5 Overall metrics of (a) RMSE and (b) R<sup>2</sup> score for different algorithms on the training set and the testing set

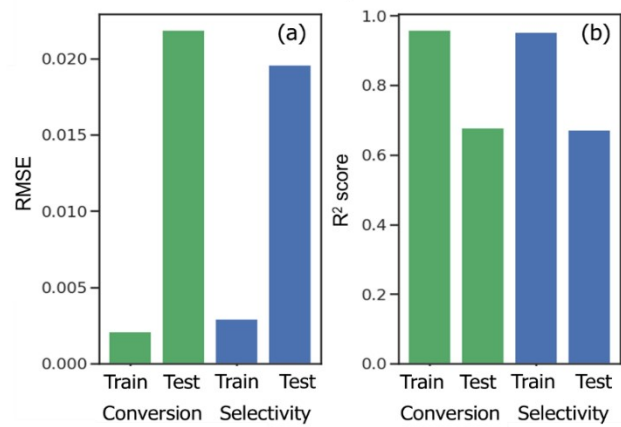

Fig. S6 Overall metrics of (a) RMSE and (b) R<sup>2</sup> score for RF algorithm on the training set and the testing set of propane conversion and propylene conversion

Table S1 Hyperparameter used for the different machine learning methods (if not specified, the default values of scikit-learn were used)

| Machine learning algorithm | Hyperparameters                                                                                                                                                                                                                                                                                             |
|----------------------------|-------------------------------------------------------------------------------------------------------------------------------------------------------------------------------------------------------------------------------------------------------------------------------------------------------------|
| ANN                        | verbose: 0, epochs: 500, neuron number: 6 (search from 2 to 20)                                                                                                                                                                                                                                             |
| SVR                        | C: 10 (search from 1 to 20), cache_size: 200, coef0: 0.0, degree: 3, epsilon: 0.01 (search from 0.001 to 0.1), gamma: 1 (search from 1 to 10), kernel: rbf, max_iter: -1, shrinking: True, tol: 0.001, verbose: False                                                                                       |
| KNN                        | number of neighbors: 9 (search from 1 to 50), weight function: distance                                                                                                                                                                                                                                     |
| RF                         | bootstrap: True, max_depth: None, max_features: 1.0, max_leaf_nodes: None, max_samples: None, min_impurity_decrease: 0.0, min_samples_leaf: 1, min_samples_split: 2, min_weight_fraction_leaf: 0.0, n_estimators: 11 (search from 1 to 25), n_jobs: None, random_state: None, verbose: 0, warm_start: False |
