# Supplementary material for: Explainable machine-learning predictions for catalysts in CO 2 -assisted propane oxidative dehydrogenation
Source: Royal Society of Chemistry journal article supplement (doi:10.1039/d4ra00406j), 2024-01-01
Supplement: d4ra00406j2.xlsx [file d4ra00406j2.xlsx]

## Sheet: Sheet1
Nr	Catalysts	Propane	CO2	Inert	CO2_to_propane	Temp	Catal_weight	Total_flow	C3_WHSV	Conv	Select	STY	Note	Reference
1	Mo/Al2O3	100	0	0	0	525	200	2	1.17857	25	38	0.106875		CO2 Assisted Oxidative Dehydrogenation of Propane to Propylene over Fluidizable MoO3/La2O3-γAl2O3 Catalysts
2	Mo/Al2O3	33.3	66.7	0	2.003	525	200	6	1.17739	48.1	83.1	0.449225
3	Mo/Al2O3	100	0	0	0	600	200	2	1.17857	74	11	0.091575
4	Mo/Al2O3	33.3	66.7	0	2.003	600	200	6	1.17739	91.6	21	0.216189
5	Mo/La2O3-Al2O3(1:2)	100	0	0	0	525	200	2	1.17857	20	60	0.135
6	Mo/La2O3-Al2O3(1:2)	100	0	0	0	550	200	2	1.17857	34	52	0.1989
7	Mo/La2O3-Al2O3(1:2)	100	0	0	0	575	200	2	1.17857	57	45	0.288562
8	Mo/La2O3-Al2O3(1:2)	100	0	0	0	600	200	2	1.17857	64	44	0.3168
9	Mo/La2O3-Al2O3(1:2)	33.3	66.7	0	2.003	525	200	6	1.17739	41	72	0.331768
10	Mo/La2O3-Al2O3(1:2)	33.3	66.7	0	2.003	550	200	6	1.17739	56	63	0.396503
11	Mo/La2O3-Al2O3(1:2)	33.3	66.7	0	2.003	575	200	6	1.17739	57	55	0.352335
12	Mo/La2O3-Al2O3(1:2)	33.3	66.7	0	2.003	600	200	6	1.17739	81	30	0.273102
13	Cr/Ca-ZrO2	10	30	60	3	550	300	25	0.982143	20.2	93.5	0.177066	3 h data	One-Pot Synthesis of Ca Oxide-Promoted Cr Catalysts for the Dehydrogenation of Propane Using CO2
14	Cr/ZrO2	10	30	60	3	550	300	25	0.982143	17	88.2	0.140569	3 h data
15	Cr/SiO2	33.3	33.3	33.3	1	500			23.5714	4.9	79	0.870975		Ru-Promoted CO2 activation for Oxidative Dehydrogenation of Propane over Chromium Oxide Catalyst
16	Cr/SiO2	33.3	0	66.7	0	500			23.5714	4.8	82	0.8856
17	Ru-Cr/SiO2	33.3	33.3	33.3	1	500			23.5714	5.8	78	1.0179
18	Ru-Cr/SiO2	33.3	33.3	33.3	1	500			23.5714	7	83	1.30725
19	Ru-Cr/SiO2	33.3	33.3	33.3	1	500			23.5714	9	85	1.72125
20	Ru-Cr/SiO2	33.3	0	66.7	0	500			23.5714	4.1	88	0.8118
21	Ru-Cr/SiO2	33.3	33.3	33.3	1	500			23.5714	6.4	70	1.008
22	Ru-Cr/SiO2	33.3	33.3	33.3	1	500			23.5714	4.5	39	0.394875
23	Ru-Cr/SiO2	33.3	0	66.7	0	500			23.5714	3.8	88	0.7524
24	Pd1	25	25	50	1	550	100	40	11.7857	0.4	44.4	0.01998		The effects of bimetallic interactions for CO2‐assisted oxidative dehydrogenation and dry reforming of propane
25	Fe3Pd1	25	25	50	1	550	100	40	11.7857	0.4	57.6	0.02592
26	Co3Pd1	25	25	50	1	550	100	40	11.7857	2.8	25.2	0.07938
27	Ni3Pd1	25	25	50	1	550	100	40	11.7857	5.3	11.2	0.06678
28	Pt1	25	25	50	1	550	100	40	11.7857	1.6	21.4	0.03852
29	Fe3Pt1	25	25	50	1	550	100	40	11.7857	1.1	32	0.0396
30	Co3Pt1	25	25	50	1	550	100	40	11.7857	5.6	10.1	0.06363
31	Ni3Pt1	25	25	50	1	550	100	40	11.7857	11.6	2.8	0.03654
32	Fe1Co3	25	25	50	1	550	100	40	11.7857	0.9	43.8	0.0443475
33	Fe3Co1	25	25	50	1	550	100	40	11.7857	0.27	57.1	0.0173441
34	Fe3Ni1	25	25	50	1	550	100	40	11.7857	2.7	58.2	0.176783
35	Fe1Ni3	25	25	50	1	550	100	40	11.7857	7.4	2.9	0.0241425
36	Fe3Ni3	25	25	50	1	550	100	40	11.7857	5	20.4	0.11475
37	Co1Ni3	25	25	50	1	550	100	40	11.7857	7.8	2.6	0.022815
38	Co3Ni1	25	25	50	1	550	100	40	11.7857	7.6	2.1	0.017955
39	Co3Ni3	25	25	50	1	550	100	40	11.7857	8.5	2.4	0.02295
40	Cr/SiO2	11.1111	44.4444	44.4444	4	600	200	18	1.17857	70	79.5714	0.626625		Cr doped mesoporous silica spheres for propane dehydrogenation in the presence of CO2: Effect of Cr adding time in sol-gel process
41	Cr/ZrO2	2.5	5	92.5	2	550	200	20	0.294643	49	71	0.0978469		Facile in situ synthesis of highly dispersed chromium oxide incorporated into mesoporous ZrO2 for the dehydrogenation of propane with CO2
42	Cr/ZrO2	2.5	5	92.5	2	550	200	20	0.294643	67	64	0.1206
43	Cr/ZrO2	2.5	5	92.5	2	550	200	20	0.294643	66	62	0.115087
44	Cr/ZrO2	2.5	5	92.5	2	550	200	20	0.294643	68	59.5588	0.113906
45	Cr/ZrO2	2.5	5	92.5	2	550	200	20	0.294643	65	64	0.117
46	Cr/ZrO2	2.5	0	97.5	0	550	200	20	0.294643	59	79.661	0.132188		Effect of CO2 in the oxidative dehydrogenation reaction of propane over Cr/ZrO2 catalysts
47	Cr/ZrO2	2.5	0	97.5	0	550	200	20	0.294643	62	80.6452	0.140625
48	Cr/ZrO2	2.5	0	97.5	0	550	200	20	0.294643	69	73.913	0.143437
49	Cr/ZrO2	2.5	0	97.5	0	550	200	20	0.294643	69	65.2174	0.126562
50	Cr/ZrO2	2.5	0	97.5	0	550	200	20	0.294643	69	78.2609	0.151875
51	Cr/ZrO2	2.5	0	97.5	0	550	200	20	0.294643	66	75.7576	0.140625
52	Cr/ZrO2	2.5	0	97.5	0	550	200	20	0.294643	74	77.027	0.160312
53	Cr/ZrO2	2.5	0	97.5	0	550	200	20	0.294643	69	65.2174	0.126562
54	Cr/ZrO2	2.5	6.5	91	2.6	550	200	20	0.294643	26	69.2308	0.050625
55	Cr/ZrO2	2.5	6.5	91	2.6	550	200	20	0.294643	42	59.5238	0.0703125
56	Cr/ZrO2	2.5	6.5	91	2.6	550	200	20	0.294643	41	63.4146	0.073125
57	Cr/ZrO2	2.5	6.5	91	2.6	550	200	20	0.294643	58	51.7241	0.084375
58	Cr/ZrO2	2.5	6.5	91	2.6	550	200	20	0.294643	38	68.4211	0.073125
59	Cr/ZrO2	2.5	6.5	91	2.6	550	200	20	0.294643	36	69.4444	0.0703125
60	Cr/ZrO2	2.5	6.5	91	2.6	550	200	20	0.294643	59	57.6271	0.095625
61	Cr/ZrO2	2.5	6.5	91	2.6	550	200	20	0.294643	58	58.6207	0.095625
62	CeZrAl	37	37	26	1	500	200	15	3.27054	3	82	0.0767981	1 h data	Elucidating the Role of CO2 in the Soft Oxidative Dehydrogenation of Propane over Ceria-Based Catalysts
63	Pd/Al	37	37	26	1	500	200	15	3.27054	8.7	64	0.173826	1 h data
64	Pd/ZrAl	37	37	26	1	500	200	15	3.27054	3.3	76	0.0782966	1 h data
65	Pd/CeZr	37	37	26	1	500	200	15	3.27054	10.1	92	0.290085	1 h data
66	Pd/Ce	37	37	26	1	500	200	15	3.27054	8	84	0.20979	1 h data
67	Pd/CeZrAl	37	37	26	1	450	200	15	3.27054	4.7	92	0.13499	1 h data
68	Pd/CeZrAl	37	37	26	1	500	200	15	3.27054	9.5	93	0.275818	1 h data
69	Pd/CeZrAl	37	37	26	1	550	200	15	3.27054	12.3	84	0.322552	1 h data
70	Pd/CeZrAl	37	37	26	1	600	200	15	3.27054	19.8	38	0.23489	1 h data
71	V/MCM-41	11.1111	44.4444	44.4444	4	600	200	15	0.982143	10	86	0.080625		Preparation and catalytic properties of mesoporous nV‐MCM‐41 for propane oxidative dehydrogenation in the presence of CO2
72	V/MCM-41	11.1111	44.4444	44.4444	4	600	200	15	0.982143	20	89	0.166875
73	V/MCM-41	11.1111	44.4444	44.4444	4	600	200	15	0.982143	26	87	0.212062
74	V/MCM-41	11.1111	44.4444	44.4444	4	600	200	15	0.982143	58	89	0.483938
75	V/MCM-41	11.1111	44.4444	44.4444	4	600	200	15	0.982143	42	90	0.354375
76	V/MCM-41	11.1111	44.4444	44.4444	4	600	200	15	0.982143	15	86	0.120938
77	V/MCM-41	11.1111	0	88.8889	0	600	200	15	0.982143	25	76	0.178125
78	V/MCM-41	11.1111	11.1111	77.7778	1	600	200	15	0.982143	41	89	0.342094
79	V/MCM-41	11.1111	33.3333	55.5556	3	600	200	15	0.982143	44	89	0.367125
80	V/MCM-41	11.1111	55.5556	33.3333	5	600	200	15	0.982143	54	85	0.430312
81	Cr/SiO2	15	30	55	2	600			0.2	38	81	0.0587618		Towards efficient catalysts for the oxidative dehydrogenation of propane in the presence of CO2: Cr/SiO2 systems prepared by direct hydrothermal synthesis
82	Cr/SiO2	15	30	55	2	600			0.2	50	75	0.0715909
83	Cr/SiO2	15	30	55	2	600			0.2	62	73	0.0864055
84	Cr/SiO2	15	30	55	2	600			0.2	71	66	0.08946
85	Cr/ZrO2	2.5	5	92.5	2	550	200	20	0.294643	53.3	79	0.118426		Hydrothermally prepared Cr2O3–ZrO2 as a novel efficient catalyst for dehydrogenation of propane with CO2
86	Cr/ZrO2	2.5	0	97.5	0	550	200	20	0.294643	76.5	60.3	0.129739
87	Ga	6.66667	33.3333	60	5	550	200	30	1.17857	19	91.6	0.195795		Ordered mesoporous Ga2O3 and Ga2O3–Al2O3 prepared by nanocasting as effective catalysts for propane dehydrogenation in the presence of CO2
88	Ga/Al2O3	6.66667	33.3333	60	5	550	200	30	1.17857	19	91	0.194513
89	Ga/Al2O3	6.66667	33.3333	60	5	550	200	30	1.17857	7.5	95	0.0801562
90	Ga	6.66667	33.3333	60	5	500	200	30	1.17857	11.2	92.4	0.116424
91	Ga	6.66667	33.3333	60	5	600	200	30	1.17857	37.1	81.8	0.341413
92	Ga	2.5	5	92.5	2	500	200	10	0.147321	43.7	23.8	0.0146258		Sucrose-templated mesoporous β-Ga2O3 as a novel efficient catalyst for dehydrogenation of propane in the presence of CO2
93	Cr/SiO2	10	10	80	1	600	200	30	1.76786	35	87	0.513844		Promotional Effect of Ni on a CrOx Catalyst Supported on Silica in the Oxidative Dehydrogenation of Propane with CO2
94	Cr-Ni/SiO2	10	10	80	1	600	200	30	1.76786	90	87	1.32131
95	Cr/SBA-15	6.66667	33.3333	60	5	550	200	30	1.17857	17	92.7	0.177289		Preparation and characterization of SBA-1–supported chromium oxide catalysts for CO2 assisted dehydrogenation of propane
96	Cr/SBA-15	6.66667	33.3333	60	5	550	200	30	1.17857	25.7	90.4	0.261369
97	Cr/SBA-15	6.66667	33.3333	60	5	550	200	30	1.17857	30.5	88.7	0.304352
98	Cr/SBA-15	6.66667	33.3333	60	5	550	200	30	1.17857	37.2	85.4	0.357399
99	Cr/SBA-15	6.66667	33.3333	60	5	550	200	30	1.17857	37.7	85	0.360506
100	Cr/SBA-15	6.66667	33.3333	60	5	550	200	30	1.17857	37	85.6	0.35631
101	Cr/SBA-15	6.66667	33.3333	60	5	550	200	30	1.17857	36	85.8	0.34749
102	Cr/SiO2	16.6667	83.3333	0	5	550	500	30	1.17857	17.2	94.4	0.182664		Dehydrogenation of propane with CO2 a new green process for propene and synthesis gas production
103	Cr/SiO2	16.6667	83.3333	0	5	600	500	30	1.17857	27.7	90.8	0.282956
104	Cr/Al2O3	16.6667	83.3333	0	5	550	500	30	1.17857	12.9	88.3	0.128145
105	Cr/Al2O3	16.6667	83.3333	0	5	600	500	30	1.17857	29.7	80.7	0.269639
106	Cr/SiO2	16.6667	0	83.3333	0	550	500	30	1.17857	12.7	92.1	0.131588
107	Cr/Al2O3	16.6667	0	83.3333	0	550	500	30	1.17857	14	95.8	0.150885
108	Zn/HZSM-5	2.5	5	92.5	2	600	200	20	0.294643	99.9	0.7	0.00196678		Dehydrogenation of Propane to Propylene in the Presence of CO2 over Steaming-treated HZSM-5 Supported ZnO
109	Cr/SiO2	10	10	80	1	600	200	30	1.76786	20	85	0.286875		Preparation of Highly Dispersed Chromium Oxide Catalysts Supported on Mesoporous Silica for the Oxidative Dehydrogenation of Propane Using CO2: Insight into the Nature of Catalytically Active Chromium Sites
110	Cr/SiO2	10	10	80	1	600	200	30	1.76786	25	86	0.362812
111	Cr/SiO2	10	10	80	1	600	200	30	1.76786	37	80	0.4995
112	Cr/SiO2	10	10	80	1	600	200	30	1.76786	45	82	0.622687
113	Cr/SiO2	10	10	80	1	600	200	30	1.76786	40	85	0.57375
114	Cr/SiO2	10	10	80	1	600	200	30	1.76786	35	82	0.484312
115	In/Al2O3	2.5	10	87.5	4	600	200	10	0.147321	14	80	0.01575		Study in support effect of In2O3/MOx (M = Al, Si, Zr) catalysts for dehydrogenation of propane in the presence of CO2
116	In/SiO2	2.5	10	87.5	4	600	200	10	0.147321	4	65	0.00365625
117	In/ZrO2	2.5	10	87.5	4	600	200	10	0.147321	23	58	0.0187594
118	In/Al2O3	2.5	10	87.5	4	600	200	10	0.147321	23.6	84	0.0278775
119	In/ZrO2	2.5	10	87.5	4	600	200	10	0.147321	27.9	63.4	0.0248746
120	Cr/SBA-15	6.66667	33.3333	60	5	550	200	30	0.147321	27.2	89.3	0.0341573		Activity of chromium oxide deposited on different silica supports in the dehydrogenation of propane with CO2 – A comparative study
121	Cr/MSU-1	25	75	0	3	490			17.6786	3.88	94.34	0.617691		Intrinsic kinetics of oxidative dehydrogenation of propane in the presence of CO2 over Cr/MSU-1 catalyst
122	Cr/MSU-1	25	75	0	3	490			19.6429	3.72	95.39	0.665345
123	Cr/MSU-1	25	75	0	3	490			21.6071	3.45	95.16	0.677123
124	Cr/MSU-1	25	75	0	3	490			23.5714	3.26	95.07	0.697338
125	Cr/MSU-1	25	75	0	3	490			25.5357	3.11	95.38	0.72304
126	Cr/MSU-1	25	75	0	3	490			27.5	2.98	94.37	0.738209
127	Cr/MSU-1	25	75	0	3	490			29.4643	2.81	94.45	0.74645
128	Cr/MSU-1	25	75	0	3	500			17.6786	5.08	94.99	0.814302
129	Cr/MSU-1	25	75	0	3	500			19.6429	4.9	95.18	0.874466
130	Cr/MSU-1	25	75	0	3	500			21.6071	4.52	95.37	0.889087
131	Cr/MSU-1	25	75	0	3	500			23.5714	4.22	95.47	0.906488
132	Cr/MSU-1	25	75	0	3	500			25.5357	3.94	95.46	0.916774
133	Cr/MSU-1	25	75	0	3	500			27.5	3.76	95.77	0.94525
134	Cr/MSU-1	25	75	0	3	500			29.4643	3.51	95.52	0.942962
135	Cr/MSU-1	25	75	0	3	510			17.6786	7.67	93.82	1.21432
136	Cr/MSU-1	25	75	0	3	510			19.6429	7	93.92	1.2327
137	Cr/MSU-1	25	75	0	3	510			21.6071	6.51	94.13	1.26387
138	Cr/MSU-1	25	75	0	3	510			23.5714	5.88	93.38	1.23542
139	Cr/MSU-1	25	75	0	3	510			25.5357	5.45	93.93	1.2478
140	Cr/MSU-1	25	75	0	3	510			27.5	5.08	93.94	1.25269
141	Cr/MSU-1	25	75	0	3	510			29.4643	4.8	93.65	1.26428
142	Cr/MSU-1	25	75	0	3	520			17.6786	9.37	92.68	1.46544
143	Cr/MSU-1	25	75	0	3	520			19.6429	8.8	93.47	1.54225
144	Cr/MSU-1	25	75	0	3	520			21.6071	7.65	93.02	1.46768
145	Cr/MSU-1	25	75	0	3	520			23.5714	7.21	93.4	1.51518
146	Cr/MSU-1	25	75	0	3	520			25.5357	6.84	93.34	1.55621
147	Cr/MSU-1	25	75	0	3	520			27.5	6.32	93.06	1.54387
148	Cr/MSU-1	25	75	0	3	520			29.4643	6.09	93.44	1.60045
149	Cr/MSU-1	25	75	0	3	530			17.6786	11.01	90.4	1.67958
150	Cr/MSU-1	25	75	0	3	530			19.6429	10.09	91.2	1.72539
151	Cr/MSU-1	25	75	0	3	530			21.6071	9.2	91.8	1.74191
152	Cr/MSU-1	25	75	0	3	530			23.5714	8.51	91.33	1.74874
153	Cr/MSU-1	25	75	0	3	530			25.5357	7.97	92.13	1.7898
154	Cr/MSU-1	25	75	0	3	530			27.5	7.68	92.23	1.85936
155	Cr/MSU-1	25	75	0	3	530			29.4643	7.14	92.27	1.8529
156	Ga/HZSM-5	2.5	5	92.5	2	600	200	20	0.294643	57.5	40.2	0.0650109		Dehydrogenation of Propane to Propylene over Ga2O3 Supported on Mesoporous HZSM-5 in the Presence of CO2
157	Ga/HZSM-5	2.5	5	92.5	2	600	200	20	0.294643	59.2	38.1	0.0634365
158	Ga/HZSM-5	2.5	5	92.5	2	600	200	20	0.294643	48.9	45.1	0.0620266
159	Ga/HZSM-5	2.5	5	92.5	2	600	200	20	0.294643	46.8	44.7	0.0588364
160	Ga/HZSM-5	2.5	5	92.5	2	600	200	20	0.294643	62	38	0.0662625
161	Cr/SBA-1	6.66667	33.3333	60	5	550	200	30	1.17857	16	58	0.1044		Investigation of catalytic activity of CrSBA-1 materials obtained by direct method in the dehydrogenation of propane with CO2
162	Cr/SBA-1	6.66667	33.3333	60	5	550	200	30	1.17857	22	90	0.22275
163	Cr/SBA-1	6.66667	33.3333	60	5	550	200	30	1.17857	26.7	90.2	0.270938
164	Cr/SBA-1	6.66667	33.3333	60	5	550	200	30	1.17857	27	90	0.273375
165	Cr/SBA-1	6.66667	33.3333	60	5	550	200	30	1.17857	22	88	0.2178
166	Cr/SBA-1	6.66667	33.3333	60	5	500	200	30	1.17857	12.9	91.7	0.13308
167	Cr/SBA-1	6.66667	33.3333	60	5	600	200	30	1.17857	39.4	86.6	0.383854
168	Cr/SBA-1	6.66667	33.3333	60	5	650	200	30	1.17857	55.2	76.7	0.476307
169	Zn/HZSM-5	2.5	5	92.5	2	600	200	20	0.294643	86.2	18.9	0.0458207		ZnO supported on high silica HZSM-5 as new catalysts for dehydrogenation of propane to propene in the presence of CO2
170	Zn/HZSM-5	2.5	5	92.5	2	600	200	20	0.294643	73	32	0.0657
171	Zn/HZSM-5	2.5	5	92.5	2	600	200	20	0.294643	68.3	46.8	0.0898999
172	Zn/HZSM-5	2.5	5	92.5	2	600	200	20	0.294643	53.1	49.5	0.0739252
173	Zn/HZSM-5	2.5	5	92.5	2	600	200	20	0.294643	40.2	56.1	0.0634281
174	Cr/MCM-41	16.6667	83.3333	0	5	550	500	30	1.17857	17	89	0.170212		Chromium oxide supported on MCM-41 as a highly active and selective catalyst for dehydrogenation of propane with CO2
175	Cr/MCM-41	16.6667	83.3333	0	5	550	500	30	1.17857	28	90	0.2835
176	Cr/MCM-41	16.6667	83.3333	0	5	550	500	30	1.17857	34	89	0.340425
177	Cr/MCM-41	16.6667	83.3333	0	5	550	500	30	1.17857	39	88	0.3861
178	Cr/MCM-41	16.6667	83.3333	0	5	550	500	30	1.17857	30	90	0.30375
179	Cr/SiO2	12.5	87.5	0	7	400	500	30	0.883929	1.9	100	0.0160313		ROLE OF CO2 IN DEHYDROGENATION OF PROPANE OVER CrOX/SiO2 CATALYST WITH LOW Cr CONTENT
180	Cr/SiO2	12.5	87.5	0	7	450	500	30	0.883929	6.9	96.5	0.0561811
181	Cr/SiO2	12.5	87.5	0	7	500	500	30	0.883929	15.6	94.7	0.124649
182	Cr/SiO2	12.5	87.5	0	7	550	500	30	0.883929	25.3	94.6	0.201941
183	Cr/SiO2	12.5	87.5	0	7	600	500	30	0.883929	36.3	92.4	0.283004
184	Cr/SiO2	12.5	0	87.5	0	400	500	30	0.883929	1.1	100	0.00928125
185	Cr/SiO2	12.5	0	87.5	0	450	500	30	0.883929	4.6	100	0.0388125
186	Cr/SiO2	12.5	0	87.5	0	500	500	30	0.883929	6.3	96.7	0.0514021
187	Cr/SiO2	12.5	0	87.5	0	550	500	30	0.883929	15.3	95	0.122639
188	Cr/SiO2	12.5	0	87.5	0	600	500	30	0.883929	28.7	91.1	0.220604
189	Ga/ZrO2	2.5	5	92.5	2	600	200	20	0.294643	27.9	54.3	0.0426085		Dehydrogenation of ethylbenzene and propane over Ga2O3–ZrO2 catalysts in the presence of CO2
190	Ga/ZrO2	2.5	5	92.5	2	600	200	20	0.294643	32.8	48	0.04428
191	Ga/ZrO2	2.5	5	92.5	2	600	200	20	0.294643	38.6	45.4	0.0492874
192	Ga/ZrO2	2.5	5	92.5	2	600	200	20	0.294643	41.8	43.1	0.0506694
193	ZrO2	2.5	5	92.5	2	600	200	20	0.294643	5.6	77.8	0.0122535
194	Ga/TiO2	2.5	5	92.5	2	600	200	20	0.294643	32	73	0.0657		Support effect in dehydrogenation of propane in the presence of CO2 over supported gallium oxide catalysts
195	Ga/Al2O3	2.5	5	92.5	2	600	200	20	0.294643	26	94	0.0687375
196	Ga/ZrO2	2.5	5	92.5	2	600	200	20	0.294643	30	65	0.0548437
197	Ga/SiO2	2.5	5	92.5	2	600	200	20	0.294643	6.4	92	0.01656
198	Ga/MgO	2.5	5	92.5	2	600	200	20	0.294643	4.3	29	0.00350719
199	Cr/SiO2	12.5	87.5	0	7	600	500	30	0.883929	36.3	92.3	0.282698		Effect of supports on catalytic activity of chromium oxide-based catalysts in the dehydrogenation of propane with CO2
200	Cr/SiO2	12.5	87.5	0	7	600	500	30	0.883929	19.3	92.1	0.149979
201	Cr/SiO2	12.5	87.5	0	7	600	500	30	0.883929	27.7	90.8	0.212217
202	Cr/SiO2	12.5	87.5	0	7	600	500	30	0.883929	21.5	90.6	0.164354
203	Cr/Al2O3	12.5	87.5	0	7	600	500	30	0.883929	14.3	84.1	0.101472
204	Cr/Al2O3	12.5	87.5	0	7	600	500	30	0.883929	29.7	80.5	0.201728
205	Cr/Al2O3	12.5	87.5	0	7	600	500	30	0.883929	41.9	79.6	0.281411
206	Cr/MCM-41	12.0316	67.9487	20.0197	5.64754	550	400	50.0267	1.77345	17	94.1176	0.270854		Behavior of active sites on Cr-MCM-41 catalysts during the dehydrogenation of propane with CO2
207	Ga/MCM-41	12.0316	67.9487	20.0197	5.64754	550	400	50.0267	1.77345	5	90	0.0761778
208	Ni/MCM-41	12.0316	67.9487	20.0197	5.64754	550	400	50.0267	1.77345	3	96.6667	0.0490924
209	V/MCM-41	12.0316	67.9487	20.0197	5.64754	550	400	50.0267	1.77345	2.7	96.2963	0.0440138
210	Fe/MCM-41	12.0316	67.9487	20.0197	5.64754	550	400	50.0267	1.77345	1.5	93.3333	0.0236998
211	Mn/MCM-41	12.0316	67.9487	20.0197	5.64754	550	400	50.0267	1.77345	1.3	92.3077	0.0203141
212	Co/MCM-41	12.0316	67.9487	20.0197	5.64754	550	400	50.0267	1.77345	0.8	87.5	0.0118499
213	Fe	17	83	0	4.88235	600	200	30	3.00536	8.2	92.5	0.217595		INFLUENCE OF REDOX PROPERTIES ON THE ACTIVITY OF IRON OXIDE CATALYSTS IN DEHYDROGENATION OF PROPANE WITH CO2
214	Fe/Al2O3	17	83	0	4.88235	600	200	30	3.00536	2.3	83.6	0.0551603
215	Fe/C	17	83	0	4.88235	600	200	30	3.00536	29.7	86.2	0.73444
216	Fe/MgO	17	83	0	4.88235	600	200	30	3.00536	3	73.7	0.0634281
217	Fe/MgO	17	83	0	4.88235	600	200	30	3.00536	3	83.2	0.071604
218	Fe	17	0	83	0	600	200	30	3.00536	1.9	84.1	0.0458398
219	Fe/Al2O3	17	0	83	0	600	200	30	3.00536	2.7	85.5	0.0662251
220	Fe/C	17	0	83	0	600	200	30	3.00536	12.5	78.8	0.282572
221	Fe/MgO	17	0	83	0	600	200	30	3.00536	3.2	84.4	0.0774792
222	Fe/MgO	17	0	83	0	600	200	30	3.00536	4.8	90.7	0.124894
223	Ga	16.6667	83.3333	0	5	600	500	30	1.17857	32.8	93.9	0.346491		Dehydrogenation of propane to propene over gallium oxide in the presence of CO2
224	Ga-K	16.6667	83.3333	0	5	600	500	30	1.17857	18.6	92.1	0.192719
225	Ga-K	16.6667	83.3333	0	5	600	500	30	1.17857	1.3	66.9	0.00978412
226	Ga-K	16.6667	0	83.3333	0	600	500	30	1.17857	1.3	74.4	0.010881
227	Cr/MFI	14.9556	14.9556	70.0888	1	600			1.1	3.5	92	0.03381		Oxidative Dehydrogenation of Propane with CO2 Over Cr/H[B]MFI Catalysts
228	Cr/B-MFI	14.9556	14.9556	70.0888	1	600			1.1	22.1	91	0.211166
229	In/Al2O3	2.5	10	87.5	4	600	1000	100	0.294643	8	51	0.011475		Effect of acid-base characteristics of In2O3-Al2O3(ZrO2) compositions on their catalytic properties in the oxidative dehydrogenation of propane to propylene with CO2
230	In/Al2O3	2.5	10	87.5	4	600	1000	100	0.294643	11	32	0.0099
231	Cr/S-1	16	80	4	5	550	500	25	0.942857	26	86	0.20124		Active and selective nature of supported CrOx for the oxidative dehydrogenation of propane with carbon dioxide
232	Cr/S-1	16	80	4	5	550	500	25	0.942857	35	82	0.2583
233	Cr/S-1	16	80	4	5	550	500	25	0.942857	45	75	0.30375
234	Cr/S-1	16	80	4	5	550	500	25	0.942857	51	67	0.30753
235	Cr/S-1	16	80	4	5	550	500	25	0.942857	48	69	0.29808
236	Zr/Ti	4.6729	95.3271	0	20.4	600	300		1.86916	56.2	56.4	0.565533		C–H and C–C bond activation of propane to propylene and ethylene selectivity assisted by CO2 over titania catalysts
237	Tl/Ti	4.6729	95.3271	0	20.4	600	300		1.86916	34.8	16.8	0.104311
238	TiO2	4.6729	95.3271	0	20.4	600	300		1.86916	90	4	0.0642311
239	ZnIn/HZSM-5	10	40	50	4	580	200	20	1.17857	19.87	67.8532	0.151677	0.3 Mpa压力	Coupling of propane with CO2 to propylene over Zn-promoted In/HZSM-5 catalyst
240	ZnIn/HZSM-5	10	40	50	4	580	200	20	1.17857	34	15.5882	0.059625
241	GaBeta	2.5	15	82.5	6	600	200	30	0.4	28	74	0.0791127		Ga(Nb,Ta)SiBEA zeolites prepared by two‑step postsynthesis method: acid–base characteristics and catalytic performance in the dehydrogenation of propane to propylene with CO2
242	GaBeta	2.5	15	82.5	6	600	200	30	0.4	31	63	0.0745691
243	GaBeta	2.5	15	82.5	6	600	200	30	0.4	57.5	73	0.160268
244	GaTaBeta	2.5	15	82.5	6	600	200	30	0.4	29	77	0.08526
245	GaNbBeta	2.5	15	82.5	6	600	200	30	0.4	20	71	0.0542182
246	V/Al2O3	33.3	66.7	0	2.003	525	200	6	1.17739	44	82	0.405494		Promotional effects of CO2 on the oxidative dehydrogenation of propane over mesoporous VOX/gAl2O3 catalysts
247	V/Al2O3	33.3	66.7	0	2.003	500	200	6	1.17739	60	75	0.457417
248	V/Al2O3	33.3	66.7	0	2.003	575	200	6	1.17739	71	60	0.478771
249	V/Al2O3	33.3	66.7	0	2.003	600	200	6	1.17739	80	51	0.458541
250	V/Al2O3	100	0	0	0	525	200	2	1.17857	55	74	0.457875
251	V/Al2O3	100	0	0	0	500	200	2	1.17857	56	60	0.378
252	V/Al2O3	100	0	0	0	575	200	2	1.17857	70	41	0.322875
253	V/Al2O3	100	0	0	0	600	200	2	1.17857	77	34	0.294525
254	V/La2O3-Al2O3	100	0	0	0	600	200	6	3.53571	75	18	0.455625
255	V/La2O3-Al2O3	100	0	0	0	525	200	6	3.53571	25	80	0.675
256	V/La2O3-Al2O3	100	0	0	0	550	200	6	3.53571	28	66	0.6237
257	2VOx/AC	33	33	34	1	550			3.92857	12.3	40	0.1845		Role of CO2 During Oxidative Dehydrogenation of Propane Over Bulk and Activated‑Carbon Supported Cerium and Vanadium Based Catalysts
258	5VOx/AC	33	33	34	1	550			3.92857	10.5	51	0.200813
259	12VOx/AC	33	33	34	1	550			3.92857	13.8	44	0.2277
260	10CeVO4/AC	33	33	34	1	550			3.92857	7	29	0.076125
261	15CeVO4/AC	33	33	34	1	550			3.92857	9.3	43	0.149962
262	20CeVO4/AC	33	33	34	1	550			3.92857	11.2	57	0.2394
263	30CeVO4/AC	33	33	34	1	550			3.92857	15.3	49	0.281137
264	40CeVO4/AC	33	33	34	1	550			3.92857	12.9	62	0.299925
265	7CeO2/AC	33	33	34	1	550			3.92857	12.4	34	0.1581
266	12CeO2/AC	33	33	34	1	550			3.92857	9.7	62	0.225525
267	17CeO2/AC	33	33	34	1	550			3.92857	10.1	28	0.10605
268	CeO2	33	33	34	1	550			3.92857	5.6	10	0.021
269	V2O5	33	33	34	1	550			3.92857	9.4	26	0.09165
270	CeVO4	33	33	34	1	550			3.92857	4.3	27	0.0435375
